# Supplementary material
Source: publisher figshare collection journal article supplement (https://sage.figshare.com/ndownloader/files/13569515)
Supplement: Supplementary file 1 [file 13569515]

Supplementary Table 1: Characteristics of responders and non responders

|                            | A. Non responders to<br>baseline (n=274) | B. Responders to<br>baseline and non<br>responders to<br>follow up (n=98) | C. Analytic sample<br>(n=543) |
|----------------------------|------------------------------------------|---------------------------------------------------------------------------|-------------------------------|
| Age mean (SD)*,**          | 58.2 (SD 14.7)                           | 59.5 (SD14.2)                                                             | 63.9 (SD 12.1)                |
| Female sex N(%)            | 129 (47.1%)                              | 43 (43.9%)                                                                | 286 (52.7%)                   |
| Race/ethnicity             | n/a                                      |                                                                           |                               |
| Non Hispanic White<br>N(%) |                                          | 83 (84.7%)                                                                | 502 (92.4%)                   |
| Black N(%)                 |                                          | 5 (5.1%)                                                                  | 13 (2.4%)                     |
| Hispanic N(%)              |                                          | 2 (2.0%)                                                                  | 6 (1.6%)                      |
| Other or Multiple N(%)     |                                          | 4 (4.1%)                                                                  | 16 (2.9%)                     |
| Missing                    |                                          | 4 (4.1%)                                                                  | 6 (1.1%)                      |
| Education N(%)**           | n/a                                      |                                                                           |                               |
| High school or less        |                                          | 23 (23.5%)                                                                | 76 (14.0%)                    |
| Some college               |                                          | 30 (30.6%)                                                                | 122 (22.5%)                   |
| College degree or more     |                                          | 42 (42.9%)                                                                | 342 (63.0%)                   |
| Missing                    |                                          | 3 (3.1%)                                                                  | 3 (0.6%)                      |
| Topic N(%)                 |                                          |                                                                           |                               |
| Knee                       | 95 (34.7%)                               | 44 (44.9%)                                                                | 230 (42.4%)                   |
| Hip                        | 69 (25.2%)                               | 18 (18.4%)                                                                | 151 (27.8%)                   |

|                                     |             |                |                |
|-------------------------------------|-------------|----------------|----------------|
| Spinal Stenosis                     | 46 (16.8%)  | 18 (18.4%)     | 98 (18.0%)     |
| Herniated Disc*                     | 64 (23.4%)  | 18 (18.4%)     | 64 (11.8%)     |
| Baseline quality of life<br>(EQ-5D) | n/a         | 0.61 (SD 0.22) | 0.64 (SD 0.21) |
| Received Decision Aid               | 136 (49.6%) | 41 (41.8%)     | 253 (46.6%)    |

n/a=data not available; \*p<0.001 comparing non responders (column A) to responders (combined B/C); \*\*p=0.002 comparing column B to column C
